# Supplementary material for: Two Complete Mitochondrial Genomes of Mileewinae (Hemiptera: Cicadellidae) and a Phylogenetic Analysis
Source: MDPI journal article supplement (doi:10.3390/insects12080668), 2021-07-22
Supplement: s1 [file s1]

# Supplementary Material

## Two Complete Mitochondrial Genomes of Mileewinae (Hemiptera: Cicadellidae) and a Phylogenetic Analysis

Tinghao Yu and Yalin Zhang \*

Key Laboratory of Plant Protection Resources and Pest Management, Ministry of Education, Entomological Museum, College of Plant Protection, Northwest A&F University, Yangling, Shaanxi 712100, China; 18404965218@163.com (T.Y.)

\* Correspondence: yalinzhang@nwsuaf.edu.cn; Tel.: +86-029-87092190

**Table S1.** Collection information for the Mileewinae species in this study.

| Name                    | Locality                            | Time          | Collector    |
|-------------------------|-------------------------------------|---------------|--------------|
| <i>Mileewa rufivena</i> | Mountain Fanjing, Guizhou, China    | 30-April-2018 | Lin-Shuanghu |
| <i>Ujna puerana</i>     | Five Finger Mountain, Hainan, China | 8-July-2018   | Du-Lan       |

**Table S2.** Primers used for mitogenome analysis. F: forward; R: reverse.

| No. | Primer sequence (5'-3')       | Annealing temperature | Amplified region        |
|-----|-------------------------------|-----------------------|-------------------------|
| 1   | F: AATTAAGCTACTAGGTTTCATACCC  | 52 °C                 | ND2 (980 bp)            |
|     | R: ACARCTTTGAAGGYTAWTAGTTT    | 52 °C                 |                         |
| 2   | F: GCCTGATAAAAAGGRTTAYYTTGATA | 51 °C                 | trnM-ND2-trnW (1560 bp) |
|     | R: TTTATTCGTGGRAATGCYATRTC    | 51 °C                 |                         |

**Table S3.** Best partitioning scheme and nucleotide substitution models for different datasets selected by PartitionFinder.

| Data Matrix | Subset Partitions                                                | Model       |
|-------------|------------------------------------------------------------------|-------------|
| PCG123-BI   | 1. <i>nad6_pos1, atp6_pos1</i>                                   | GTR + I + G |
|             | 2. <i>cox3_pos2, atp6_pos2, cox2_pos2, cytb_pos2</i>             | GTR + I + G |
|             | 3. <i>cytb_pos3, atp6_pos3, nad6_pos3, atp8_pos3, nad3_pos3,</i> | GTR + G     |
|             | 4. <i>atp8_pos1, nad3_pos1, nad2_pos1</i>                        | GTR + I + G |
|             | 5. <i>atp8_pos2, nad2_pos2, nad6_pos2, nad3_pos2</i>             | GTR + I + G |
|             | 6. <i>cox1_pos1</i>                                              | GTR + I + G |
|             | 7. <i>cox1_pos2</i>                                              | GTR + I + G |
|             | 8. <i>cox1_pos3, cox3_pos3, cox2_pos3</i>                        | HKY + G     |
|             | 9. <i>cytb_pos1, cox2_pos1, cox3_pos1</i>                        | GTR + I + G |
|             | 10. <i>nad1_pos1, nad4L_pos1, nad4_pos1, nad5_pos1</i>           | GTR + I + G |
|             | 11. <i>nad1_pos2, nad4L_pos2, nad5_pos2, nad4_pos2</i>           | GTR + I + G |
|             | 12. <i>nad1_pos3</i>                                             | HKY + G     |

|           |                                                                 |                   |
|-----------|-----------------------------------------------------------------|-------------------|
|           | 13. <i>nad2_pos3</i>                                            | GTR + G           |
|           | 14. <i>nad5_pos3, nad4L_pos3, nad4_pos3</i>                     | HKY + I + G       |
| PCG123-ML | 1. <i>nad6_pos1, atp6_pos1</i>                                  | GTR + I + G       |
|           | 2. <i>cytb_pos2, cox3_pos2, atp6_pos2, cox2_pos2</i>            | TVM + I + G       |
|           | 3. <i>cytb_pos3, atp8_pos3, atp6_pos3, nad3_pos3, nad6_pos3</i> | GTR + G           |
|           | 4. <i>atp8_pos1, nad3_pos1, nad2_pos1</i>                       | TIM + I + G       |
|           | 5. <i>atp8_pos2, nad2_pos2, nad6_pos2, nad3_pos2</i>            | GTR + I + G       |
|           | 6. <i>cox1_pos1</i>                                             | GTR + I + G       |
|           | 7. <i>cox1_pos2</i>                                             | TVM + I + G       |
|           | 8. <i>cox1_pos3</i>                                             | HKY + G           |
|           | 9. <i>nad1_pos1, cox3_pos1, cox2_pos1</i>                       | GTR + I + G       |
|           | 10. <i>cox3_pos3, cox2_pos3</i>                                 | HKY + G           |
|           | 11. <i>nad1_pos1, nad4L_pos1, nad4_pos1, nad5_pos1</i>          | GTR + I + G       |
|           | 12. <i>nad1_pos2, nad4L_pos2, nad5_pos2, nad4_pos2</i>          | GTR + I + G       |
|           | 13. <i>nad1_pos3</i>                                            | HKY + G           |
|           | 14. <i>nad2_pos3</i>                                            | TRN + G           |
|           | 15. <i>nad5_pos3, nad4_pos3, nad4L_pos3</i>                     | HKY + I + G       |
| PCG12-BI  | 1. <i>nad3, atp6</i>                                            | GTR + I + G       |
|           | 2. <i>atp8, nad6</i>                                            | GTR + I + G       |
|           | 3. <i>cox1</i>                                                  | GTR + I + G       |
|           | 4. <i>cytb, cox2, cox3</i>                                      | GTR + I + G       |
|           | 5. <i>nad1</i>                                                  | GTR + I + G       |
|           | 6. <i>nad2</i>                                                  | GTR + I + G       |
|           | 7. <i>nad4, nad4L, nad5</i>                                     | GTR + I + G       |
| PCG12-ML  | 1. <i>nad3, apt6</i>                                            | GTR + I + G       |
|           | 2. <i>atp8, nad6</i>                                            | GTR + I + G       |
|           | 3. <i>cox1</i>                                                  | GTR + I + G       |
|           | 4. <i>cytb, cox3, cox2</i>                                      | GTR + I + G       |
|           | 5. <i>nad1</i>                                                  | GTR + I + G       |
|           | 6. <i>nad2</i>                                                  | GTR + I + G       |
|           | 7. <i>nad4, nad5, nad4L</i>                                     | TVM + I + G       |
| AA-BI     | 1. <i>atp6, cox2, nad4, nad5</i>                                | MTREV + I + G     |
|           | 2. <i>nad4L, nad3, atp8, nad1</i>                               | MTREV + I + G     |
|           | 3. <i>cox1</i>                                                  | MTREV + I + G     |
|           | 4. <i>cox3, cytb</i>                                            | MTREV + I + G     |
|           | 5. <i>nad6, nad2</i>                                            | MTREV + I + G     |
| AA-ML     | 1. <i>atp8, nad3, nad6, cox2, cytb, atp6, nad2, cox3</i>        | MTART + I + G + F |
|           | 2. <i>cox1</i>                                                  | MTART + I + G     |
|           | 3. <i>nad4L, nad5, nad1, nad4</i>                               | MTART + I + G + F |

**Table S4.** Nucleotide composition and skewness comparison of Mileewinae mtgenomes.

| Species               | Feature            | Size(bp) | T%   | C%   | A%   | G%   | A+ T% | AT-skew | GC-skew |
|-----------------------|--------------------|----------|------|------|------|------|-------|---------|---------|
| <i>M. alara</i>       | PCGs               | 10964    | 43.2 | 11.9 | 33.1 | 11.7 | 76.3  | -0.132  | -0.009  |
|                       | Control region     | 1607     | 40.4 | 9.5  | 42.8 | 7.3  | 83.2  | 0.028   | -0.130  |
|                       | 1st codon position | 3655     | 44.2 | 14.4 | 26.2 | 15.3 | 70.4  | -0.257  | 0.030   |
|                       | 2st codon position | 3655     | 46.7 | 10.9 | 33.7 | 8.5  | 80.4  | -0.162  | -0.127  |
|                       | 3st codon position | 3654     | 38.7 | 10.4 | 39.5 | 11.3 | 78.2  | 0.010   | 0.043   |
|                       | tRNAs              | 1439     | 39.7 | 8.2  | 40.4 | 11.7 | 80.1  | 0.010   | 0.175   |
|                       | rRNAs              | 2037     | 48.6 | 7.0  | 31.6 | 12.8 | 80.2  | -0.212  | 0.294   |
|                       | Whole genome       | 16020    | 33.9 | 13.4 | 44.0 | 8.6  | 77.9  | 0.129   | -0.217  |
| <i>M. albovittata</i> | PCGs               | 10961    | 44.5 | 10.4 | 34.1 | 11.0 | 78.6  | -0.132  | 0.030   |
|                       | Control region     | 714      | 44.5 | 6.4  | 43.4 | 5.5  | 87.9  | -0.013  | -0.082  |
|                       | 1st codon position | 3654     | 44.6 | 13.6 | 26.6 | 15.2 | 71.2  | -0.252  | 0.055   |
|                       | 2st codon position | 3654     | 48.4 | 9.0  | 35.7 | 6.9  | 84.1  | -0.151  | -0.129  |
|                       | 3st codon position | 3653     | 40.4 | 8.6  | 40.0 | 11   | 80.4  | -0.005  | 0.122   |
|                       | tRNAs              | 1420     | 39.3 | 8.2  | 41.1 | 11.5 | 80.4  | 0.022   | 0.168   |
|                       | rRNAs              | 1963     | 45.6 | 6.8  | 36.1 | 11.5 | 81.7  | -0.116  | 0.253   |
|                       | Whole genome       | 15079    | 35.9 | 12.0 | 43.7 | 8.4  | 79.6  | 0.097   | -0.178  |
| <i>M. margheritae</i> | PCGs               | 10953    | 44.4 | 10.8 | 33.1 | 11.4 | 77.5  | -0.146  | 0.030   |
|                       | Control region     | 908      | 46.1 | 7.0  | 43.0 | 3.7  | 89.1  | -0.036  | -0.306  |
|                       | 1st codon position | 3651     | 44.3 | 14.1 | 26.4 | 15.2 | 70.7  | -0.254  | 0.038   |
|                       | 2st codon position | 3651     | 48.4 | 9.4  | 34.2 | 7.4  | 82.6  | -0.172  | -0.119  |
|                       | 3st codon position | 3651     | 40.4 | 8.9  | 38.6 | 11.8 | 79.0  | -0.023  | 0.141   |
|                       | tRNAs              | 1440     | 40.4 | 8.0  | 40.1 | 11.3 | 80.5  | -0.004  | 0.173   |
|                       | rRNAs              | 2050     | 45.0 | 7.2  | 36.3 | 11.2 | 81.3  | -0.107  | 0.217   |
|                       | Whole genome       | 15375    | 36.6 | 12   | 42.4 | 8.7  | 79.0  | 0.074   | -0.158  |
| <i>M. ponta</i>       | PCGs               | 10950    | 45.3 | 10.2 | 33.7 | 10.6 | 79.0  | -0.147  | 10950   |
|                       | Control region     | 1610     | 31.0 | 10.7 | 51.7 | 6.6  | 82.7  | 0.325   | -0.240  |
|                       | 1st codon position | 3650     | 45.1 | 13.8 | 26.2 | 14.9 | 71.3  | -0.266  | 0.039   |
|                       | 2st codon position | 3650     | 49.6 | 8.4  | 35.2 | 6.6  | 84.8  | -0.169  | -0.117  |
|                       | 3st codon position | 3650     | 41.3 | 8.5  | 39.8 | 10.4 | 81.1  | -0.019  | 0.100   |
|                       | tRNAs              | 1440     | 39.4 | 8.0  | 41.3 | 11.1 | 80.7  | 0.023   | 0.164   |
|                       | rRNAs              | 1993     | 46.1 | 6.7  | 35.5 | 11.7 | 81.6  | -0.129  | 0.273   |
|                       | Whole genome       | 15999    | 35.3 | 11.8 | 44.6 | 8.2  | 79.9  | 0.117   | -0.18   |
| <i>M. rufivena</i>    | PCGs               | 10936    | 43.7 | 10.9 | 34.1 | 11.3 | 77.8  | -0.123  | 0.018   |
|                       | Control region     | 1476     | 46.1 | 7.7  | 38.6 | 7.5  | 84.7  | -0.089  | -0.013  |
|                       | 1st codon position | 3646     | 43.5 | 7.0  | 40.8 | 8.6  | 84.3  | -0.032  | 0.098   |
|                       | 2st codon position | 3645     | 40.9 | 12.6 | 32.4 | 14.1 | 73.3  | -0.116  | 0.055   |
|                       | 3st codon position | 3645     | 46.6 | 13.1 | 29.0 | 11.3 | 75.6  | -0.233  | -0.074  |
|                       | tRNAs              | 1445     | 39.4 | 8.3  | 41.2 | 11.1 | 80.6  | 0.022   | 0.146   |
|                       | rRNAs              | 1972     | 46.0 | 7.1  | 34.4 | 12.5 | 80.4  | -0.144  | 0.275   |
|                       | Whole genome       | 15837    | 36.3 | 12.2 | 42.7 | 8.8  | 79.0  | 0.080   | -0.165  |
| <i>U. puerana</i>     | PCGs               | 10956    | 43.7 | 11.6 | 32.7 | 12.0 | 76.4  | -0.144  | 0.016   |

|                    |       |      |      |      |      |      |        |        |
|--------------------|-------|------|------|------|------|------|--------|--------|
| Control region     | 518   | 38.4 | 11.4 | 40.2 | 10.0 | 78.6 | 0.022  | -0.063 |
| 1st codon position | 3652  | 38.7 | 11.9 | 35.4 | 14.0 | 74.1 | -0.045 | 0.083  |
| 2st codon position | 3652  | 47.3 | 13.8 | 25.9 | 12.9 | 73.2 | -0.293 | -0.034 |
| 3st codon position | 3652  | 45.1 | 9.1  | 36.9 | 9.0  | 82.0 | -0.100 | -0.006 |
| tRNAs              | 1422  | 38.3 | 9.4  | 40.4 | 12.0 | 78.7 | 0.027  | 0.125  |
| rRNAs              | 1979  | 46.7 | 7.7  | 32.7 | 12.8 | 79.4 | -0.176 | 0.246  |
| Whole genome       | 14838 | 34.4 | 13.1 | 42.7 | 9.8  | 77.1 | 0.108  | -0.147 |

---

**Table S5.** Mitogenomic organization of *Mileewa rufivena*.

| Name              | Location |       | Size(bp) | Intergeni<br>nucleotid | Codon |      | Strand |
|-------------------|----------|-------|----------|------------------------|-------|------|--------|
|                   | From     | To    |          |                        | Start | Stop |        |
| <i>trnI</i>       | 1        | 65    | 65       | 0                      |       |      | J      |
| <i>trnQ</i>       | 63       | 130   | 68       | -3                     |       |      | N      |
| <i>trnM</i>       | 131      | 196   | 66       | 0                      |       |      | J      |
| <i>nad2</i>       | 197      | 1165  | 969      | 0                      | ATA   | TAG  | J      |
| <i>trnW</i>       | 1164     | 1227  | 64       | -2                     |       |      | J      |
| <i>trnC</i>       | 1220     | 1285  | 66       | -8                     |       |      | N      |
| <i>trnY</i>       | 1291     | 1357  | 67       | 5                      |       |      | N      |
| <i>cox1</i>       | 1361     | 2896  | 1536     | 3                      | ATG   | TAA  | J      |
| <i>trnL2(UUR)</i> | 2898     | 2963  | 66       | 1                      |       |      | J      |
| <i>cox2</i>       | 2964     | 3642  | 679      | 0                      | ATA   | T    | J      |
| <i>trnK</i>       | 3644     | 3715  | 72       | 1                      |       |      | J      |
| <i>trnD</i>       | 3724     | 3788  | 65       | 8                      |       |      | J      |
| <i>atp8</i>       | 3789     | 3941  | 153      | 0                      | TTG   | TAA  | J      |
| <i>atp6</i>       | 3935     | 4588  | 654      | -7                     | ATG   | TAA  | J      |
| <i>cox3</i>       | 4591     | 5370  | 780      | 2                      | ATG   | TAA  | J      |
| <i>trnG</i>       | 5370     | 5431  | 62       | -1                     |       |      | J      |
| <i>nad3</i>       | 5432     | 5785  | 354      | 0                      | ATT   | TAA  | J      |
| <i>trnA</i>       | 5785     | 5843  | 59       | -1                     |       |      | J      |
| <i>trnR</i>       | 5845     | 5912  | 68       | 1                      |       |      | J      |
| <i>trnN</i>       | 5910     | 5976  | 67       | -3                     |       |      | J      |
| <i>trnS1(ACN)</i> | 5976     | 6041  | 66       | -1                     |       |      | J      |
| <i>trnE</i>       | 6045     | 6110  | 66       | 3                      |       |      | J      |
| <i>trnF</i>       | 6111     | 6177  | 67       | 0                      |       |      | N      |
| <i>nad5</i>       | 6181     | 7854  | 1674     | 3                      | TTG   | TAA  | N      |
| <i>trnH</i>       | 7855     | 7916  | 62       | 0                      |       |      | N      |
| <i>nad4</i>       | 7918     | 9237  | 1320     | 1                      | ATG   | TAA  | N      |
| <i>nad4L</i>      | 9231     | 9506  | 276      | -7                     | ATG   | TAA  | N      |
| <i>trnT</i>       | 9509     | 9573  | 65       | 2                      |       |      | J      |
| <i>trnP</i>       | 9574     | 9640  | 67       | 0                      |       |      | N      |
| <i>nad6</i>       | 9643     | 10134 | 492      | 2                      | ATC   | TAA  | J      |
| <i>cytb</i>       | 10127    | 11263 | 1137     | -8                     | ATG   | TAA  | J      |
| <i>trnS2(UCN)</i> | 11264    | 11326 | 63       | 0                      |       |      | J      |
| <i>nad1</i>       | 11344    | 12255 | 912      | 17                     | ATT   | TAA  | N      |
| <i>trnL1(CUN)</i> | 12256    | 12323 | 68       | 0                      |       |      | N      |
| <i>rrnL</i>       | 12324    | 13541 | 1218     | 0                      |       |      | N      |
| <i>trnV</i>       | 13542    | 13607 | 66       | 0                      |       |      | N      |
| <i>rrnS</i>       | 13608    | 14361 | 754      | 0                      |       |      | N      |
| CR                | 14362    | 15837 | 1476     | 0                      |       |      | J      |

**Table S6.** Mitogenomic organization of *Ujna puerana*.

| Name              | Location |       | Size(bp) | Intergenic<br>nucleotide | Codon |      | Strand |
|-------------------|----------|-------|----------|--------------------------|-------|------|--------|
|                   | From     | To    |          |                          | Start | Stop |        |
| <i>trnI</i>       | 1        | 67    | 67       | -3                       |       |      | J      |
| <i>trnQ</i>       | 65       | 133   | 69       | 1                        |       |      | N      |
| <i>trnM</i>       | 135      | 203   | 69       | 0                        |       |      | J      |
| <i>nad2</i>       | 204      | 1169  | 966      | -2                       | ATA   | TAA  | J      |
| <i>trnW</i>       | 1168     | 1230  | 63       | -8                       |       |      | J      |
| <i>trnC</i>       | 1223     | 1286  | 64       | 4                        |       |      | N      |
| <i>trnY</i>       | 1291     | 1353  | 63       | -2                       |       |      | N      |
| <i>cox1</i>       | 1352     | 2887  | 1536     | 1                        | ATG   | TAA  | J      |
| <i>trnL2(UUR)</i> | 2889     | 2953  | 65       | 0                        |       |      | J      |
| <i>cox2</i>       | 2954     | 3632  | 679      | 1                        | ATG   | T    | J      |
| <i>trnK</i>       | 3634     | 3705  | 72       | 0                        |       |      | J      |
| <i>trnD</i>       | 3706     | 3768  | 63       | 0                        |       |      | J      |
| <i>atp8</i>       | 3769     | 3921  | 153      | -4                       | ATA   | TAA  | J      |
| <i>atp6</i>       | 3918     | 4568  | 651      | 1                        | ATA   | TAA  | J      |
| <i>cox3</i>       | 4570     | 5347  | 778      | 0                        | ATG   | T    | J      |
| <i>trnG</i>       | 5348     | 5409  | 62       | 0                        |       |      | J      |
| <i>nad3</i>       | 5410     | 5763  | 354      | -2                       | ATA   | TAG  | J      |
| <i>trnA</i>       | 5762     | 5821  | 60       | -1                       |       |      | J      |
| <i>trnR</i>       | 5821     | 5885  | 65       | 2                        |       |      | J      |
| <i>trnN</i>       | 5888     | 5950  | 63       | -1                       |       |      | J      |
| <i>trnS1(ACN)</i> | 5950     | 6015  | 66       | -1                       |       |      | J      |
| <i>trnE</i>       | 6015     | 6079  | 65       | -1                       |       |      | J      |
| <i>trnF</i>       | 6079     | 6139  | 61       | 0                        |       |      | N      |
| <i>nad5</i>       | 6140     | 7814  | 1675     | 0                        | ATG   | T    | N      |
| <i>trnH</i>       | 7815     | 7878  | 64       | 0                        |       |      | N      |
| <i>nad4</i>       | 7879     | 9192  | 1314     | -4                       | ATA   | TAA  | N      |
| <i>nad4L</i>      | 9189     | 9464  | 276      | 2                        | ATG   | TAA  | N      |
| <i>trnT</i>       | 9467     | 9529  | 63       | 0                        |       |      | J      |
| <i>trnP</i>       | 9530     | 9594  | 65       | 2                        |       |      | N      |
| <i>nad6</i>       | 9597     | 10088 | 492      | -8                       | ATC   | TAA  | J      |
| <i>cytb</i>       | 10081    | 11217 | 1137     | -1                       | ATG   | TAA  | J      |
| <i>trnS2(UCN)</i> | 11217    | 11278 | 62       | -10                      |       |      | J      |
| <i>nad1</i>       | 11269    | 12213 | 945      | -3                       | ATA   | TAA  | N      |
| <i>trnL1(CUN)</i> | 12211    | 12275 | 65       | 0                        |       |      | N      |
| <i>rrnL</i>       | 12276    | 13491 | 1216     | 0                        |       |      | N      |
| <i>trnV</i>       | 13492    | 13557 | 66       | 0                        |       |      | N      |
| <i>rrnS</i>       | 13558    | 14320 | 763      | 0                        |       |      | N      |
| CR                | 14321    | 14838 | 518      | 0                        |       |      | J      |
